# Supplementary material for: The significance of nitrogen cost minimization in proteomes of marine microorganisms
Source: PubMed Central journal article supplement — ISME J. 2011 Jun 23;6(1):71–80. doi: 10.1038/ismej.2011.72 (PMC3246230; doi:10.1038/ismej.2011.72), 2011-06-23
Supplement: ismej201172x1.pdf [file ismej201172x1.pdf]

**Table S1. Spearman correlation results of geography, Nitrate concentration and genome metrics from GOS sample sites. Spearman correlation results of genome metrics for the marine microbe data in Table S2.**

| <b>GOS Data</b>       |                       | <b>Rho</b> | <b>Pval</b> |
|-----------------------|-----------------------|------------|-------------|
| <b>Type1</b>          | <b>Type 2</b>         |            |             |
| Med N ARSC            | Distance from land    | -0.7334    | 4.927E-08   |
| Med N ARSC            | Nitrate concentration | 0.6993     | 3.658E-07   |
| Med N ARSC            | GC%                   | 0.9204     | 1.694E-17   |
| Distance from land    | Nitrate concentration | -0.6297    | 1.03E-05    |
| Distance from land    | GC%                   | -0.5729    | 9.046E-05   |
| Distance from land    | Median average mass   | 0.3925     | 0.0111      |
| GC%                   | Nitrate concentration | 0.6905     | 5.859E-07   |
| GC%                   | Median average mass   | -0.7486    | 4.826E-08   |
| Nitrate Concentration | Median average mass   | -0.4617    | 0.0024      |

  

| <b>Marine Microbe Data</b> |                 | <b>Rho</b> | <b>Pval</b> |
|----------------------------|-----------------|------------|-------------|
| <b>Type1</b>               | <b>Type 2</b>   |            |             |
| Median average mass        | Med N ARSC      | -0.4873    | 2.94E-10    |
| Median average mass        | GC%             | -0.9364    | 7.05E-86    |
| Median average mass        | Med % Arg       | -0.8730    | 1.08E-47    |
| Median average mass        | Med % Lys       | 0.9344     | 8.81E-68    |
| Med N ARSC                 | GC%             | 0.6306     | 6.79E-18    |
| Med N ARSC                 | Med % Arg       | 0.7727     | 8.09E-31    |
| Med N ARSC                 | Med % Lys       | -0.6396    | 1.64E-18    |
| GC%                        | Med % Arg       | 0.9501     | 2.84E-76    |
| GC%                        | Med % Lys       | -0.9445    | 6.28E-73    |
| GC%                        | Total minimum N | 0.3182     | 7.65E-05    |
| GC%                        | Total maximim N | 0.3213     | 6.48E-05    |
| Med % Arg                  | Med % Lys       | -0.9352    | 3.59E-68    |
