# Supplementary material for: The significance of nitrogen cost minimization in proteomes of marine microorganisms
Source: PubMed Central journal article supplement — ISME J. 2011 Jun 23;6(1):71–80. doi: 10.1038/ismej.2011.72 (PMC3246230; doi:10.1038/ismej.2011.72), 2011-06-23
Supplement: ismej201172x2.pdf [file ismej201172x2.pdf]

Table S2. Marine microbe genome data (see methods), amino acid usage and theoretical Nitrogen contents of proteins and DNA.

| Genus Species                      | Strain         | PID     | Genome Size | General Genomic Information |                                          |                          |                                             | Median ARSC |         | Num Of ORF Analyzed | Median Mass Per Residue |       |
|------------------------------------|----------------|---------|-------------|-----------------------------|------------------------------------------|--------------------------|---------------------------------------------|-------------|---------|---------------------|-------------------------|-------|
|                                    |                |         |             | Percent of Open Ocean       | Percent of Open Ocean Standard Deviation | Percent of Coastal Ocean | Percent of Coastal Ocean Standard Deviation | GC %        | N       |                     | C:N                     |       |
|                                    |                |         |             |                             |                                          |                          |                                             |             |         |                     |                         |       |
| Candidatus Pelagibacter sp.        | HTCC7211       | 19339   | 1456888     | 6.14%                       | 0.17%                                    | 4.91%                    | 0.14%                                       | 29.00       | 1447    | 113.175             | 0.345                   | 8.999 |
| Candidatus Pelagibacter sp.        | HTCC1002       | 13577   | 1326089     | 2.89%                       | 0.12%                                    | 2.25%                    | 0.13%                                       | 29.70       | 1387    | 113.084             | 0.340                   | 9.121 |
| Candidatus Pelagibacter sp.        | HTCC1062       | 13989   | 1308759     | 1.85%                       | 0.16%                                    | 1.41%                    | 0.15%                                       | 29.68       | 1354    | 112.993             | 0.339                   | 9.106 |
| Prochlorococcus marinus            | AS9601         | 13548   | 1674733     | 1.40%                       | 0.09%                                    | 0.40%                    | 0.04%                                       | 31.33       | 1921    | 113.268             | 0.344                   | 9.043 |
| Unnamed alphaproteobacterium       | BAL199         | 19281   | 6101023     | 1.31%                       | 0.08%                                    | 1.09%                    | 0.08%                                       | 65.02       | 6128    | 108.553             | 0.376                   | 7.441 |
| Prochlorococcus marinus            | MIT9301        | 15746   | 1642753     | 1.24%                       | 0.07%                                    | 0.36%                    | 0.04%                                       | 31.34       | 1907    | 113.256             | 0.344                   | 8.994 |
| Unnamed SAR11 alphaproteobacterium | HIMB114        | 41237   | 1294666     | 0.87%                       | 0.07%                                    | 0.66%                    | 0.05%                                       | 29.61       | 1425    | 113.453             | 0.349                   | 8.948 |
| Prochlorococcus marinus            | MIT9312        | 13910   | 1709204     | 0.69%                       | 0.06%                                    | 0.19%                    | 0.03%                                       | 31.21       | 1810    | 113.117             | 0.345                   | 9.012 |
| Prochlorococcus marinus            | MIT9202        | 19343   | 1691453     | 0.57%                       | 0.05%                                    | 0.16%                    | 0.03%                                       | 31.00       | 1890    | 113.302             | 0.348                   | 8.976 |
| Unnamed gammaproteobacterium       | HTCC2143       | 13605   | 3925629     | 0.50%                       | 0.05%                                    | 0.49%                    | 0.06%                                       | 47.00       | 3662    | 110.414             | 0.340                   | 8.544 |
| Prochlorococcus marinus            | MIT9215        | 18633   | 1738790     | 0.50%                       | 0.04%                                    | 0.15%                    | 0.03%                                       | 31.15       | 1982    | 113.328             | 0.345                   | 9.011 |
| Microscilla marina                 | ATCC23134      | 13411   | 9771226     | 0.44%                       | 0.06%                                    | 0.42%                    | 0.07%                                       | 40.60       | 8319    | 113.817             | 0.367                   | 8.586 |
| Unnamed Flavobacteriales bacterium | HTCC2170       | 13595   | 3873100     | 0.42%                       | 0.05%                                    | 0.48%                    | 0.07%                                       | 37.00       | 3478    | 113.028             | 0.329                   | 9.399 |
| Kordia algicida                    | OT-1           | 19315   | 5019836     | 0.37%                       | 0.05%                                    | 0.43%                    | 0.05%                                       | 34.00       | 4514    | 113.735             | 0.336                   | 9.320 |
| Unnamed gammaproteobacterium       | HTCC2207       | 16658   | 2619777     | 0.36%                       | 0.05%                                    | 0.43%                    | 0.05%                                       | 51.00       | 2388    | 110.015             | 0.333                   | 8.623 |
| Unnamed gammaproteobacterium       | HTCC2080       | 18487   | 3576081     | 0.36%                       | 0.05%                                    | 0.54%                    | 0.06%                                       | 51.82       | 3185    | 109.410             | 0.340                   | 8.382 |
| Janibacter sp.                     | HTCC2649       | 13546   | 4228723     | 0.35%                       | 0.04%                                    | 0.31%                    | 0.04%                                       | 68.00       | 4078    | 106.863             | 0.347                   | 7.852 |
| Algoriphagus sp.                   | PR1            | 18947   | 4776234     | 0.34%                       | 0.04%                                    | 0.31%                    | 0.06%                                       | 38.72       | 4215    | 112.858             | 0.320                   | 9.664 |
| Unnamed gammaproteobacterium       | HTCC2148       | 30725   | 4325790     | 0.33%                       | 0.04%                                    | 0.37%                    | 0.04%                                       | 51.25       | 3827    | 109.944             | 0.343                   | 8.417 |
| Labrenzia aggregata                | IAM12614       | 18315   | 6561391     | 0.33%                       | 0.04%                                    | 0.28%                    | 0.04%                                       | 59.00       | 6314    | 109.136             | 0.349                   | 8.138 |
| Prochlorococcus marinus            | CCMP1986       | 213     | 1657990     | 0.32%                       | 0.04%                                    | 0.06%                    | 0.02%                                       | 30.80       | 1717    | 113.007             | 0.345                   | 8.998 |
| Unnamed Flavobacteriales bacterium | ALC-1          | 19307   | 3825707     | 0.32%                       | 0.05%                                    | 0.40%                    | 0.06%                                       | 32.40       | 3445    | 113.344             | 0.326                   | 9.537 |
| Pseudovibrio sp.                   | JE062          | 19345   | 5726521     | 0.32%                       | 0.04%                                    | 0.26%                    | 0.04%                                       | 52.53       | 5225    | 109.800             | 0.335                   | 8.604 |
| Unnamed Rhodobacterales bacterium  | HTCC2255       | 17677   | 4809064     | 0.30%                       | 0.04%                                    | 0.31%                    | 0.04%                                       | 39.00       | 2240    | 110.616             | 0.333                   | 8.768 |
| Labrenzia alexandrii               | DFL-11         | 19367   | 5502380     | 0.30%                       | 0.04%                                    | 0.25%                    | 0.03%                                       | 56.41       | 5385    | 109.055             | 0.341                   | 8.341 |
| Hoeflea phototrophica              | DFL-43         | 19311   | 4458057     | 0.30%                       | 0.04%                                    | 0.25%                    | 0.04%                                       | 59.81       | 4357    | 108.587             | 0.348                   | 8.024 |
| Unnamed Verrucomicrobiae bacterium | DG1235         | 19391   | 5770561     | 0.29%                       | 0.05%                                    | 0.29%                    | 0.05%                                       | 54.26       | 4909    | 110.820             | 0.347                   | 8.517 |
| Aciduliprofundum boonei            | T469           | 38403   | 2967866     | 0.28%                       | 0.04%                                    | 0.27%                    | 0.04%                                       | 39.14       | 1544    | 113.733             | 0.345                   | 8.992 |
| Neptuniibacter caesariensis        | MED92          | 13561   | 4039111     | 0.26%                       | 0.04%                                    | 0.24%                    | 0.04%                                       | 47.00       | 3687    | 111.277             | 0.341                   | 8.623 |
| Unnamed Rhodobacterales bacterium  | HTCC2150       | 18973   | 3582902     | 0.26%                       | 0.05%                                    | 0.24%                    | 0.05%                                       | 49.06       | 3667    | 109.492             | 0.340                   | 8.413 |
| Planctomyces maris                 | DSM8797        | 15662   | 7775452     | 0.26%                       | 0.04%                                    | 0.24%                    | 0.04%                                       | 50.45       | 6480    | 111.511             | 0.364                   | 8.143 |
| Unnamed gammaproteobacterium       | NOR5-1-B       | 31355   | 3261541     | 0.26%                       | 0.04%                                    | 0.34%                    | 0.05%                                       | 57.00       | 2930    | 109.402             | 0.348                   | 8.190 |
| Leeuwenhoekella blandensis         | MED217         | 13573   | 4238065     | 0.24%                       | 0.04%                                    | 0.26%                    | 0.04%                                       | 40.00       | 3735    | 112.831             | 0.328                   | 9.373 |
| Marinobacter algicola              | DG893          | 19321   | 4412179     | 0.24%                       | 0.04%                                    | 0.23%                    | 0.03%                                       | 56.98       | 4127    | 110.370             | 0.366                   | 7.879 |
| Roceibacter atlanticus             | HTCC2559       | 13570   | 2951152     | 0.24%                       | 0.07%                                    | 0.24%                    | 0.06%                                       | 34.00       | 2702    | 112.887             | 0.325                   | 9.470 |
| Plesiocystis pacifica              | SIR-1          | 19341   | 10585045    | 0.23%                       | 0.04%                                    | 0.20%                    | 0.04%                                       | 70.66       | 8450    | 107.915             | 0.370                   | 7.499 |
| Unnamed Actinobacterium            | PHSC20c1       | 13373   | 2766287     | 0.23%                       | 0.05%                                    | 0.29%                    | 0.05%                                       | 59.00       | 2668    | 107.336             | 0.330                   | 8.393 |
| Limnobacter sp.                    | MED105         | 19317   | 3390271     | 0.22%                       | 0.08%                                    | 0.22%                    | 0.08%                                       | 52.18       | 3245    | 109.910             | 0.349                   | 8.298 |
| Alcanivorax sp.                    | DG881          | 19279   | 3800634     | 0.22%                       | 0.03%                                    | 0.20%                    | 0.03%                                       | 58.23       | 3337    | 110.145             | 0.364                   | 7.927 |
| Unnamed gammaproteobacterium       | NOR5-3         | 31353   | 4206598     | 0.21%                       | 0.04%                                    | 0.22%                    | 0.04%                                       | 56.31       | 3671    | 109.624             | 0.356                   | 7.999 |
| Unnamed Flavobacterium             | BAL38          | 18953   | 2803466     | 0.21%                       | 0.06%                                    | 0.24%                    | 0.06%                                       | 31.43       | 2612    | 113.579             | 0.323                   | 9.735 |
| Reinekea sp.                       | MED297         | 13534   | 4506331     | 0.21%                       | 0.03%                                    | 0.19%                    | 0.03%                                       | 52.00       | 4194    | 111.149             | 0.358                   | 8.240 |
| Marinomonas sp.                    | MED121         | 13587   | 5121076     | 0.21%                       | 0.03%                                    | 0.19%                    | 0.03%                                       | 42.00       | 4803    | 111.532             | 0.333                   | 8.914 |
| Pedobacter sp.                     | BAL39          | 19337   | 5788054     | 0.21%                       | 0.03%                                    | 0.21%                    | 0.03%                                       | 44.92       | 5101    | 112.348             | 0.338                   | 9.045 |
| Unnamed Rhodobacterales bacterium  | HTCC2083       | 13508   | 4015194     | 0.20%                       | 0.03%                                    | 0.24%                    | 0.03%                                       | 53.30       | 4179    | 109.163             | 0.340                   | 8.307 |
| Oceanicaulis alexandrii            | HTCC2633       | 13448   | 3166372     | 0.20%                       | 0.04%                                    | 0.17%                    | 0.03%                                       | 64.00       | 3028    | 108.432             | 0.354                   | 7.921 |
| Carboxydibrachium pacificum        | JM (DSM12653)  | 19289   | 2311713     | 0.20%                       | 0.03%                                    | 0.15%                    | 0.03%                                       | 38.47       | 1686    | 112.574             | 0.322                   | 9.589 |
| Polaribacter dokdonensis           | MED152         | 13543   | 2967100     | 0.19%                       | 0.04%                                    | 0.22%                    | 0.04%                                       | 31.00       | 2611    | 113.402             | 0.329                   | 9.530 |
| Prochlorococcus marinus            | MIT9515        | 13617   | 1710076     | 0.19%                       | 0.03%                                    | 0.06%                    | 0.02%                                       | 30.80       | 1906    | 113.389             | 0.349                   | 8.959 |
| Blastopirellula marina             | DSM3645        | 13488   | 6653746     | 0.19%                       | 0.03%                                    | 0.19%                    | 0.04%                                       | 57.00       | 5686    | 110.174             | 0.367                   | 7.887 |
| Bacillus sp.                       | SG-1           | 19283   | 3944880     | 0.19%                       | 0.03%                                    | 0.15%                    | 0.03%                                       | 42.09       | 4337    | 112.816             | 0.330                   | 9.238 |
| Congregibacter litoralis           | KT71           | 13585   | 4325534     | 0.19%                       | 0.03%                                    | 0.20%                    | 0.03%                                       | 58.00       | 3939    | 109.721             | 0.358                   | 7.957 |
| Hydrogenivirga sp.                 | 128-5-R1-1     | 19313   | 2275409     | 0.19%                       | 0.03%                                    | 0.16%                    | 0.03%                                       | 43.00       | 3808    | 113.762             | 0.346                   | 9.094 |
| Roseobacter litoralis              | Och 149        | 19357   | 4678915     | 0.18%                       | 0.06%                                    | 0.20%                    | 0.06%                                       | 57.25       | 4746    | 108.882             | 0.345                   | 8.150 |
| Dokdonia donghaensis               | MED134         | 13544   | 3298531     | 0.18%                       | 0.04%                                    | 0.20%                    | 0.04%                                       | 38.00       | 2944    | 112.439             | 0.323                   | 9.432 |
| Lentisphaera araneosa              | HTCC2155       | 13437   | 6021958     | 0.18%                       | 0.03%                                    | 0.17%                    | 0.05%                                       | 40.95       | 5104    | 113.133             | 0.358                   | 8.563 |
| Microcoleus chthonoplastes         | PCC7420        | 19325   | 8651623     | 0.18%                       | 0.05%                                    | 0.16%                    | 0.04%                                       | 45.43       | 8294    | 112.039             | 0.367                   | 8.227 |
| Roseobacter sp.                    | AzwK-3b        | 19361   | 4209812     | 0.18%                       | 0.03%                                    | 0.20%                    | 0.03%                                       | 61.85       | 4145    | 108.947             | 0.365                   | 7.697 |
| Octadecabacter antarcticus         | 238            | 19331   | 5388160     | 0.18%                       | 0.06%                                    | 0.14%                    | 0.05%                                       | 55.21       | 5834    | 109.637             | 0.372                   | 7.692 |
| Psychroflexus torquus              | ATCC700755     | 13542   | 4312844     | 0.17%                       | 0.04%                                    | 0.19%                    | 0.04%                                       | 35.26       | 4032    | 114.028             | 0.334                   | 9.366 |
| Lynngbya sp.                       | PCC8106        | 13409   | 7037511     | 0.17%                       | 0.04%                                    | 0.14%                    | 0.04%                                       | 41.00       | 6142    | 112.420             | 0.356                   | 8.524 |
| Sagittula stellata                 | E-37           | 18971   | 5261741     | 0.17%                       | 0.03%                                    | 0.18%                    | 0.03%                                       | 64.97       | 5067    | 108.424             | 0.354                   | 7.898 |
| Nitrosococcus oceani               | AFC-27         | 13547   | 3469829     | 0.17%                       | 0.03%                                    | 0.17%                    | 0.03%                                       | 50.31       | 3396    | 111.468             | 0.385                   | 7.776 |
| Marinobacter sp.                   | ELB17          | 18955   | 4893590     | 0.17%                       | 0.03%                                    | 0.16%                    | 0.02%                                       | 54.24       | 4850    | 110.309             | 0.369                   | 7.819 |
| Alteromonas macleodii              | 'deep ecotype' | 13374   | 4408257     | 0.17%                       | 0.03%                                    | 0.16%                    | 0.03%                                       | 45.00       | 4072    | 110.961             | 0.338                   | 8.744 |
| Methylophaga thiooxidans           | DMS010         | 19323   | 3047652     | 0.17%                       | 0.03%                                    | 0.17%                    | 0.03%                                       | 46.16       | 3001    | 111.287             | 0.353                   | 8.312 |
| Silicibacter lacuscaerulensis      | ITI-1157       | 37681   | 3523710     | 0.16%                       | 0.03%                                    | 0.17%                    | 0.03%                                       | 63.00       | 3611    | 109.031             | 0.364                   | 7.749 |
| Trichodesmium erythraeum           | IMS101         | 318     | 7750108     | 0.16%                       | 0.07%                                    | 0.14%                    | 0.06%                                       | 34.14       | 4451    | 112.960             | 0.353                   | 8.778 |
| Bermanella marisrubri              | 13562          | 3527084 | 0.16%       | 0.03%                       | 0.15%                                    | 0.03%                    | 43.96                                       | 2542        | 111.945 | 0.350               | 8.511                   |       |
| Unnamed Rhodobacterales bacterium  | HTCC2654       | 13614   | 4529231     | 0.16%                       | 0.03%                                    | 0.14%                    | 0.03%                                       | 65.00       | 4500    | 108.620             | 0.348                   | 8.064 |
| Unnamed Flavobacterium             | SCB49          | 19389   | 3202734     | 0.16%                       | 0.03%                                    | 0.18%                    | 0.04%                                       | 34.04       | 2948    | 112.859             | 0.318                   | 9.666 |

|                                    |                   |       |         |       |       |       |       |       |      |         |       |       |
|------------------------------------|-------------------|-------|---------|-------|-------|-------|-------|-------|------|---------|-------|-------|
| Unnamed gammaproteobacterium       | HTCC5015          | 19309 | 2622479 | 0.15% | 0.03% | 0.14% | 0.03% | 54.05 | 2459 | 110.775 | 0.370 | 7.881 |
| Aurantimonas sp.                   | SI85-9A1          | 13607 | 4325257 | 0.15% | 0.03% | 0.13% | 0.02% | 67.00 | 3607 | 108.005 | 0.362 | 7.614 |
| Fulvimarina pelagi                 | HTCC2506          | 13506 | 3800929 | 0.15% | 0.03% | 0.12% | 0.03% | 66.00 | 3754 | 108.911 | 0.358 | 7.872 |
| Bacillus sp.                       | NRRL B-14911      | 13545 | 5072318 | 0.15% | 0.03% | 0.13% | 0.03% | 45.72 | 4522 | 112.049 | 0.331 | 9.145 |
| Unnamed Alteromonadales bacterium  | TW-7              | 18465 | 4101856 | 0.15% | 0.03% | 0.12% | 0.03% | 40.00 | 3783 | 111.356 | 0.331 | 8.954 |
| Unnamed betaproteobacterium        | KB13              | 13602 | 1334326 | 0.15% | 0.04% | 0.16% | 0.04% | 35.37 | 1318 | 112.884 | 0.340 | 9.043 |
| Oceanicola granulosa               | HTCC2516          | 13450 | 4039111 | 0.15% | 0.03% | 0.13% | 0.03% | 70.00 | 3784 | 107.948 | 0.360 | 7.665 |
| Cyanothecce sp.                    | CCY0110           | 18951 | 5816986 | 0.14% | 0.03% | 0.13% | 0.03% | 36.69 | 6475 | 113.223 | 0.352 | 8.768 |
| Roseovarius nubinihibens           | ISM               | 13464 | 3668667 | 0.14% | 0.03% | 0.15% | 0.03% | 65.00 | 3543 | 108.611 | 0.358 | 7.828 |
| Thermococcus barophilus            | MP (DSMZ11836)    | 19379 | 2056187 | 0.14% | 0.03% | 0.14% | 0.03% | 41.66 | 2146 | 113.483 | 0.341 | 9.301 |
| Bacillus sp.                       | B14905            | 18949 | 4495626 | 0.14% | 0.03% | 0.12% | 0.02% | 37.58 | 4624 | 112.565 | 0.326 | 9.350 |
| Roseovarius sp.                    | HTCC2601          | 13574 | 5425920 | 0.14% | 0.03% | 0.15% | 0.04% | 61.00 | 5452 | 108.317 | 0.354 | 7.887 |
| Thalassiosium sp.                  | R2A62             | 37677 | 3488453 | 0.14% | 0.03% | 0.17% | 0.03% | 55.00 | 3696 | 108.973 | 0.342 | 8.255 |
| Nitrococcus mobilis                | Nb-231            | 13475 | 3617638 | 0.14% | 0.03% | 0.13% | 0.03% | 60.00 | 3487 | 110.509 | 0.420 | 6.912 |
| Stenotrophomonas sp.               | SKA14             | 19369 | 5017753 | 0.13% | 0.04% | 0.14% | 0.03% | 66.35 | 4469 | 108.696 | 0.386 | 7.293 |
| Unnamed Rhodobacteraceae bacterium | KLH11             | 31351 | 4486463 | 0.13% | 0.03% | 0.15% | 0.03% | 57.64 | 4274 | 109.339 | 0.357 | 7.968 |
| Synechococcus sp.                  | WH8109            | 37911 | 2118903 | 0.13% | 0.03% | 0.49% | 0.07% | 60.00 | 2577 | 109.490 | 0.378 | 7.467 |
| Roseobacter sp.                    | SK209-2-6         | 18997 | 4555826 | 0.13% | 0.02% | 0.14% | 0.03% | 57.05 | 4537 | 109.236 | 0.351 | 8.095 |
| Roseovarius sp.                    | TM1035            | 19363 | 4209812 | 0.13% | 0.03% | 0.13% | 0.03% | 60.98 | 4102 | 108.465 | 0.358 | 7.810 |
| Polaribacter irgensii              | 23-P              | 13451 | 2745458 | 0.13% | 0.03% | 0.15% | 0.03% | 35.00 | 2553 | 113.088 | 0.329 | 9.452 |
| Sphingomonas sp.                   | SKA58             | 13584 | 3948000 | 0.12% | 0.03% | 0.10% | 0.02% | 63.00 | 3835 | 108.208 | 0.371 | 7.540 |
| Idiomarina baltica                 | OS145             | 13408 | 2715224 | 0.12% | 0.03% | 0.11% | 0.02% | 47.00 | 2313 | 111.497 | 0.367 | 8.096 |
| Mariprofundus ferrooxydans         | PV-1              | 13615 | 2869318 | 0.12% | 0.03% | 0.10% | 0.02% | 54.00 | 2866 | 110.314 | 0.364 | 7.925 |
| Parvularcula bermudensis           | HTCC2503          | 13509 | 2907177 | 0.12% | 0.03% | 0.09% | 0.02% | 61.00 | 2733 | 108.463 | 0.357 | 7.901 |
| Nodularia spumigena                | CCY9414           | 13447 | 5314247 | 0.12% | 0.02% | 0.10% | 0.02% | 42.00 | 4860 | 111.841 | 0.355 | 8.536 |
| Loktanelia vestfoldensis           | SKA53             | 13444 | 3062158 | 0.12% | 0.03% | 0.12% | 0.02% | 60.00 | 3067 | 108.077 | 0.347 | 7.999 |
| Moritella sp.                      | PE36              | 13535 | 5164151 | 0.12% | 0.03% | 0.12% | 0.04% | 42.00 | 4781 | 111.094 | 0.329 | 8.975 |
| Roseobacter sp.                    | CCS2              | 18995 | 3497325 | 0.12% | 0.03% | 0.12% | 0.03% | 55.47 | 3660 | 108.795 | 0.337 | 8.339 |
| Roseobacter sp.                    | GAI-101           | 30723 | 4521165 | 0.12% | 0.02% | 0.11% | 0.02% | 58.74 | 4203 | 108.574 | 0.341 | 8.199 |
| Unnamed Flavobacterium             | BBFL7             | 13604 | 3076732 | 0.12% | 0.03% | 0.14% | 0.04% | 35.00 | 2587 | 112.971 | 0.330 | 9.280 |
| Synechococcus sp.                  | WH7805            | 13553 | 2618810 | 0.12% | 0.05% | 0.12% | 0.04% | 56.00 | 2882 | 109.523 | 0.381 | 7.450 |
| Nitrobacter sp.                    | Nb-311A           | 13538 | 4104352 | 0.12% | 0.03% | 0.09% | 0.02% | 62.00 | 2225 | 109.079 | 0.387 | 7.353 |
| Oceanicola batsensis               | HTCC2597          | 13449 | 4437668 | 0.11% | 0.03% | 0.12% | 0.03% | 67.00 | 3373 | 108.521 | 0.366 | 7.647 |
| Unnamed Methylophilales bacterium  | HTCC2181          | 18317 | 1304428 | 0.11% | 0.02% | 0.21% | 0.04% | 38.00 | 1338 | 111.950 | 0.336 | 9.009 |
| Erythro bacter litoralis           | HTCC2594          | 13480 | 3053035 | 0.11% | 0.03% | 0.09% | 0.02% | 63.00 | 3011 | 108.642 | 0.355 | 7.887 |
| Shewanella benthica                | KT99              | 13387 | 4325175 | 0.11% | 0.03% | 0.13% | 0.03% | 46.00 | 4235 | 111.189 | 0.342 | 8.629 |
| Citirecella sp.                    | SE45              | 37679 | 5523231 | 0.11% | 0.02% | 0.12% | 0.03% | 67.00 | 5427 | 108.312 | 0.363 | 7.694 |
| Roseovarius sp.                    | 217               | 13576 | 4762632 | 0.11% | 0.03% | 0.11% | 0.02% | 61.00 | 4769 | 108.755 | 0.361 | 7.797 |
| Thermococcus sp.                   | AM4               | 19381 | 2084088 | 0.11% | 0.03% | 0.11% | 0.03% | 54.79 | 2168 | 112.597 | 0.355 | 8.752 |
| Synechococcus sp.                  | RS9916 (= RCC555) | 13557 | 2664465 | 0.11% | 0.13% | 0.08% | 0.04% | 61.00 | 2961 | 109.082 | 0.378 | 7.474 |
| Brevundimonas sp.                  | BAL3              | 19287 | 3639246 | 0.11% | 0.02% | 0.09% | 0.02% | 67.37 | 3470 | 107.579 | 0.365 | 7.544 |
| Synechococcus sp.                  | PCCT7335          | 19377 | 5965029 | 0.11% | 0.02% | 0.10% | 0.02% | 48.24 | 5586 | 110.709 | 0.350 | 8.415 |
| Unnamed Rhodobacterales bacterium  | Y4I               | 19349 | 4344244 | 0.10% | 0.02% | 0.12% | 0.02% | 64.43 | 4133 | 108.345 | 0.355 | 7.911 |
| Octadecabacter antarcticus         | 307               | 19333 | 4892946 | 0.10% | 0.02% | 0.11% | 0.02% | 54.62 | 5495 | 109.484 | 0.361 | 7.885 |
| Silicibacter sp.                   | TrichCH4B         | 37909 | 4689084 | 0.10% | 0.03% | 0.12% | 0.03% | 59.00 | 4735 | 109.008 | 0.359 | 7.891 |
| Erythro bacter sp.                 | NAP1              | 13512 | 3264238 | 0.10% | 0.02% | 0.09% | 0.02% | 61.00 | 3177 | 108.514 | 0.346 | 8.084 |
| Prochlorococcus marinus            | NATL2A            | 13911 | 1842899 | 0.10% | 0.04% | 0.07% | 0.04% | 35.12 | 2162 | 112.171 | 0.345 | 8.822 |
| Photobacterium profundum           | 3TKC              | 13563 | 6096989 | 0.10% | 0.02% | 0.08% | 0.02% | 42.00 | 5407 | 111.210 | 0.333 | 8.887 |
| Synechococcus sp.                  | RS9917 (= RCC556) | 13555 | 2579542 | 0.10% | 0.08% | 0.08% | 0.06% | 61.00 | 2770 | 109.159 | 0.396 | 7.158 |
| Roseobacter sp.                    | MED193            | 13590 | 4652716 | 0.09% | 0.02% | 0.10% | 0.02% | 58.00 | 3999 | 108.984 | 0.349 | 8.097 |
| Ruegeria sp.                       | R11               | 19365 | 3821839 | 0.09% | 0.02% | 0.09% | 0.02% | 60.01 | 3656 | 108.629 | 0.353 | 7.955 |
| Vibrio shilonii                    | AK1               | 19397 | 5698984 | 0.09% | 0.02% | 0.08% | 0.02% | 43.98 | 5360 | 111.226 | 0.333 | 8.848 |
| Erythro bacter sp.                 | SD-21             | 19305 | 2969154 | 0.09% | 0.02% | 0.08% | 0.02% | 62.86 | 2941 | 108.799 | 0.358 | 7.840 |
| Oceanibulbus indolifex             | HEL-45            | 19327 | 4105524 | 0.09% | 0.10% | 0.10% | 0.03% | 59.52 | 4153 | 108.645 | 0.347 | 8.009 |
| Caminibacter mediatlanticus        | TB-2 DSM16658     | 19293 | 1662141 | 0.08% | 0.02% | 0.07% | 0.02% | 27.13 | 1826 | 114.889 | 0.331 | 9.822 |
| Carnobacterium sp.                 | AT7               | 19299 | 2442118 | 0.08% | 0.02% | 0.07% | 0.02% | 35.34 | 2388 | 112.373 | 0.314 | 9.659 |
| Prochlorococcus marinus            | MIT9211           | 13551 | 1688863 | 0.07% | 0.03% | 0.04% | 0.02% | 39.00 | 1855 | 111.513 | 0.353 | 8.512 |
| Vibrio campbellii                  | AND4              | 13564 | 4254674 | 0.07% | 0.03% | 0.07% | 0.04% | 44.66 | 3935 | 111.554 | 0.344 | 8.662 |
| Vibrio alginolyticus               | 12G01             | 13571 | 5152585 | 0.06% | 0.02% | 0.05% | 0.02% | 45.00 | 4655 | 111.517 | 0.339 | 8.748 |
| Prochlorococcus marinus            | MIT9303           | 13496 | 2681398 | 0.06% | 0.04% | 0.06% | 0.05% | 50.02 | 2997 | 110.167 | 0.373 | 7.735 |
| Phaeobacter gallaeciensis          | BS107             | 19355 | 4231299 | 0.06% | 0.02% | 0.08% | 0.02% | 59.81 | 4059 | 108.718 | 0.354 | 7.912 |
| Psychromonas sp.                   | CNP13             | 13583 | 2937686 | 0.06% | 0.02% | 0.06% | 0.02% | 39.00 | 2697 | 111.871 | 0.340 | 8.859 |
| Synechococcus sp.                  | BL107             | 13559 | 2283377 | 0.06% | 0.02% | 0.09% | 0.02% | 55.00 | 2507 | 109.810 | 0.376 | 7.617 |
| Vibrio splendidus                  | 12B01             | 13568 | 5587386 | 0.05% | 0.04% | 0.05% | 0.04% | 46.00 | 5067 | 111.462 | 0.335 | 8.852 |
| Vibrio parahaemolyticus            | 16                | 19395 | 4523781 | 0.05% | 0.02% | 0.05% | 0.01% | 46.00 | 4035 | 111.339 | 0.339 | 8.706 |
| Photobacterium sp.                 | SKA34             | 13566 | 4945266 | 0.05% | 0.02% | 0.04% | 0.02% | 41.00 | 4310 | 111.708 | 0.342 | 8.724 |
| Prochlorococcus marinus            | NATL1A            | 15660 | 1865534 | 0.05% | 0.02% | 0.03% | 0.02% | 35.02 | 2193 | 112.214 | 0.345 | 8.776 |
| Sulfitobacter sp.                  | NAS-14.1          | 13591 | 4002069 | 0.05% | 0.02% | 0.05% | 0.02% | 61.00 | 3431 | 108.745 | 0.350 | 8.027 |
| Phaeobacter gallaeciensis          | 2.1               | 19353 | 4157399 | 0.05% | 0.01% | 0.05% | 0.02% | 60.00 | 3948 | 108.622 | 0.352 | 7.945 |
| Unnamed Vibrionales bacterium      | SWAT-3            | 19399 | 5830607 | 0.04% | 0.02% | 0.05% | 0.02% | 44.48 | 5408 | 111.521 | 0.337 | 8.769 |
| Synechococcus sp.                  | WH5701            | 13554 | 2858742 | 0.04% | 0.01% | 0.04% | 0.01% | 66.00 | 3127 | 108.612 | 0.383 | 7.371 |
| Sulfitobacter sp.                  | EE-36             | 13501 | 3547243 | 0.04% | 0.02% | 0.04% | 0.01% | 61.00 | 2975 | 108.551 | 0.344 | 8.120 |
| Cyanobium sp.                      | PCC7001           | 19301 | 2832412 | 0.04% | 0.01% | 0.03% | 0.01% | 68.74 | 2771 | 108.041 | 0.387 | 7.236 |
| Prochlorococcus marinus            | CCMP1375          | 419   | 1751080 | 0.04% | 0.01% | 0.02% | 0.01% | 36.44 | 1883 | 111.659 | 0.352 | 8.541 |
| Vibrio angustum                    | S14               | 13567 | 5082513 | 0.04% | 0.03% | 0.04% | 0.02% | 40.00 | 4430 | 111.542 | 0.339 | 8.766 |
| Prochlorococcus marinus            | MIT9313           | 220   | 2410873 | 0.03% | 0.02% | 0.02% | 0.02% | 50.74 | 2269 | 109.954 | 0.373 | 7.712 |
| Pseudoalteromonas tunicata         | D2                | 13456 | 4973283 | 0.03% | 0.01% | 0.03% | 0.01% | 40.00 | 1374 | 111.611 | 0.333 | 9.000 |
| Vibrio sp.                         | MED222            | 13616 | 4882030 | 0.03% | 0.01% | 0.03% | 0.02% | 45.00 | 4525 | 111.404 | 0.334 | 8.856 |
