# Supplementary material for: The significance of nitrogen cost minimization in proteomes of marine microorganisms
Source: PubMed Central journal article supplement — ISME J. 2011 Jun 23;6(1):71–80. doi: 10.1038/ismej.2011.72 (PMC3246230; doi:10.1038/ismej.2011.72), 2011-06-23
Supplement: ismej201172x3.pdf [file ismej201172x3.pdf]

Table S3. GOS metadata, sample location information and amino acid usage

| General Genomic Information |        |               |                   |                                                          | Median ARSC                                                  |                                    |                     |                         |       |       |
|-----------------------------|--------|---------------|-------------------|----------------------------------------------------------|--------------------------------------------------------------|------------------------------------|---------------------|-------------------------|-------|-------|
| Site name                   | GC (%) | Location      | Collection region | Collection Location                                      | Nearest Annual Nitrate (miMoles/L) Objectively analyzed mean | Distance from major land mass (km) | Num Of ORF Analyzed | Median Mass Per Residue | N     | C:N   |
| GS002                       | 36.62% | Coastal ocean | North America     | Gulf of Maine                                            | 3.464                                                        | 186.936                            | 435925              | 112.355                 | 0.338 | 8.879 |
| GS003                       | 37.39% | Coastal ocean | North America     | Browns Bank, Gulf of Maine                               | 2.987                                                        | 108.185                            | 227142              | 112.362                 | 0.345 | 8.692 |
| GS004                       | 39.61% | Coastal ocean | North America     | Outside Halifax, Nova Scotia                             | 1.191                                                        | 37.591                             | 212780              | 111.853                 | 0.356 | 8.317 |
| GS007                       | 40.69% | Coastal ocean | North America     | Northern Gulf of Maine                                   | 3.311                                                        | 69.368                             | 213665              | 111.803                 | 0.362 | 8.162 |
| GS008                       | 45.27% | Coastal ocean | North America     | Newport Harbor, RI                                       | 2.207                                                        | 22.848                             | 626826              | 111.114                 | 0.397 | 7.286 |
| GS009                       | 38.26% | Coastal ocean | North America     | Block Island, NY                                         | 2.207                                                        | 42.729                             | 299605              | 111.958                 | 0.351 | 8.495 |
| GS010                       | 38.65% | Coastal ocean | North America     | Cape May, NJ                                             | 1.399                                                        | 16.883                             | 303643              | 111.855                 | 0.354 | 8.396 |
| GS013                       | 43.85% | Coastal ocean | North America     | Off Nags Head, NC                                        | 1.003                                                        | 20.966                             | 669532              | 111.250                 | 0.397 | 7.299 |
| GS014                       | 36.94% | Coastal ocean | North America     | South of Charleston, SC                                  | 0.457                                                        | 62.044                             | 483025              | 112.247                 | 0.343 | 8.761 |
| GS015                       | 36.13% | Coastal ocean | Caribbean Sea     | Off Key West, FL                                         | 0.546                                                        | 168.368                            | 462767              | 112.244                 | 0.341 | 8.823 |
| GS019                       | 35.52% | Coastal ocean | Caribbean Sea     | Northeast of Colon                                       | 0.014                                                        | 154.279                            | 477648              | 112.535                 | 0.337 | 8.958 |
| GS021                       | 39.01% | Coastal ocean | Eastern Tropic    | Gulf of Panama                                           | 1.552                                                        | 61.302                             | 540820              | 111.797                 | 0.362 | 8.238 |
| GS027                       | 37.26% | Coastal ocean | Galapagos         | Isla Devil's Crown, Floreana Island                      | 5.739                                                        | 8.431                              | 829079              | 111.985                 | 0.347 | 8.616 |
| GS028                       | 36.13% | Coastal ocean | Galapagos         | Isla Coastal ocean Floreana                              | 5.739                                                        | 8.912                              | 683152              | 112.309                 | 0.337 | 8.904 |
| GS029                       | 35.59% | Coastal ocean | Galapagos         | Isla North James Bay, Santiago Island                    | 4.634                                                        | 24.825                             | 465644              | 112.452                 | 0.335 | 9.006 |
| GS034                       | 40.18% | Coastal ocean | Galapagos         | Isla North Seamore Island                                | 4.634                                                        | 19.009                             | 574300              | 110.922                 | 0.374 | 7.836 |
| GS035                       | 36.38% | Coastal ocean | Galapagos         | Isla Wolf Island                                         | 2.284                                                        | 164.747                            | 502197              | 112.325                 | 0.339 | 8.856 |
| GS036                       | 37.27% | Coastal ocean | Galapagos         | Isla Cabo Marshall, Isabella Island                      | 2.793                                                        | 19.711                             | 302472              | 112.182                 | 0.346 | 8.664 |
| GS049                       | 34.72% | Coastal ocean | Polynesia         | Arch Moorea, Outside Cooks Bay                           | 0.276                                                        | 11.364                             | 248656              | 112.381                 | 0.328 | 9.173 |
| GS117a                      | 35.23% | Coastal ocean | Indian ocean      | St. Anne Island, Seychelles                              | 0.266                                                        | 1086.344                           | 876774              | 112.330                 | 0.325 | 9.211 |
| GS001c                      | 35.55% | Open ocean    | Sargasso Sea      | Hydrostation S                                           | 0.176                                                        | 1083.196                           | 307032              | 112.190                 | 0.333 | 9.045 |
| GS017                       | 35.97% | Open ocean    | Caribbean Sea     | Yucatan Channel                                          | 0.536                                                        | 152.301                            | 927755              | 112.483                 | 0.337 | 8.938 |
| GS018                       | 36.11% | Open ocean    | Caribbean Sea     | Rosario Bank                                             | 0.865                                                        | 264.607                            | 523739              | 112.333                 | 0.341 | 8.848 |
| GS022                       | 35.60% | Open ocean    | Eastern Tropic    | 250 miles from Panama City                               | 0.505                                                        | 192.641                            | 427726              | 112.485                 | 0.335 | 8.999 |
| GS023                       | 35.74% | Open ocean    | Eastern Tropic    | 30 miles from Cocos Island                               | 1.412                                                        | 472.089                            | 473053              | 112.385                 | 0.337 | 8.960 |
| GS026                       | 34.86% | Open ocean    | Galapagos         | Isla 134 miles NE of Galapagos                           | 2.268                                                        | 175.036                            | 349091              | 112.511                 | 0.333 | 9.098 |
| GS037                       | 36.74% | Open ocean    | Eastern Tropic    | Equatorial Pacific TAO Buoy                              | 7.681                                                        | 418.108                            | 242864              | 111.954                 | 0.343 | 8.712 |
| GS047                       | 40.01% | Open ocean    | Tropical South    | 201 miles from F. Polynesia                              | 2.611                                                        | 377.256                            | 238849              | 111.985                 | 0.343 | 8.765 |
| GS109                       | 37.08% | Open ocean    | Indian ocean      | Indian ocean                                             | 0.392                                                        | 1271.344                           | 167702              | 112.484                 | 0.325 | 9.262 |
| GS110a                      | 34.37% | Open ocean    | Indian ocean      | Indian ocean                                             | 0.241                                                        | 1532.346                           | 229106              | 112.357                 | 0.323 | 9.303 |
| GS111                       | 34.93% | Open ocean    | Indian ocean      | Indian ocean                                             | 0.229                                                        | 1325.620                           | 162527              | 112.326                 | 0.324 | 9.257 |
| GS112a                      | 34.79% | Open ocean    | Indian ocean      | Indian ocean                                             | 0.332                                                        | 891.720                            | 233918              | 112.371                 | 0.322 | 9.310 |
| GS113                       | 34.55% | Open ocean    | Indian ocean      | Indian ocean                                             | 0.444                                                        | 437.528                            | 308947              | 112.337                 | 0.325 | 9.247 |
| GS114                       | 34.81% | Open ocean    | Indian ocean      | 500 Miles west of the Seychelles in the Indian ocean     | 0.166                                                        | 856.434                            | 903527              | 112.393                 | 0.325 | 9.244 |
| GS115                       | 35.24% | Open ocean    | Indian ocean      | Indian ocean                                             | 0.204                                                        | 1342.398                           | 175647              | 112.383                 | 0.328 | 9.164 |
| GS116                       | 36.06% | Open ocean    | Indian ocean      | Outside Seychelles, Indian ocean                         | 0.252                                                        | 1180.692                           | 175349              | 112.103                 | 0.335 | 8.948 |
| GS119                       | 33.92% | Open ocean    | Indian ocean      | International Water Outside of Reunion Island            | 0.137                                                        | 382.529                            | 167470              | 112.569                 | 0.324 | 9.316 |
| GS120                       | 34.20% | Open ocean    | Indian ocean      | Madagascar Waters                                        | 0.132                                                        | 332.114                            | 113613              | 112.441                 | 0.324 | 9.291 |
| GS121                       | 34.78% | Open ocean    | Indian ocean      | International water between Madagascar and South Africa  | 0.237                                                        | 465.056                            | 313296              | 112.336                 | 0.328 | 9.169 |
| GS122a                      | 34.51% | Open ocean    | Indian ocean      | International waters between Madagascar and South Africa | 0.268                                                        | 747.454                            | 246950              | 112.423                 | 0.325 | 9.234 |
| GS123                       | 36.02% | Open ocean    | Indian ocean      | International water between Madagascar and South Africa  | 0.289                                                        | 587.438                            | 306931              | 112.096                 | 0.334 | 8.953 |
