# Supplementary material for: The significance of nitrogen cost minimization in proteomes of marine microorganisms
Source: PubMed Central journal article supplement — ISME J. 2011 Jun 23;6(1):71–80. doi: 10.1038/ismej.2011.72 (PMC3246230; doi:10.1038/ismej.2011.72), 2011-06-23
Supplement: ismej201172x4.pdf [file ismej201172x4.pdf]

**Table S4. Predicted proteome amino acid content for *Prochlorococcus marinus* CCMP1986 and MIT9313.** Data are also presented for the core genome of the two strains (i.e. genes that are found in both organisms).

| General Genomic Information    |           |                 | Median ARSC         |                         |       |       |        |       |       |       |       |       | Median Open Reading Frame Percent Amino Acid Composition |       |       |        |       |       |       |       |       |       |       |       |       |       |
|--------------------------------|-----------|-----------------|---------------------|-------------------------|-------|-------|--------|-------|-------|-------|-------|-------|----------------------------------------------------------|-------|-------|--------|-------|-------|-------|-------|-------|-------|-------|-------|-------|-------|
| Genus Species                  | Strain    | Treatment Level | Num Of ORF Analyzed | Median Mass Per Residue | N     | C:N   | Ala    | Cys   | Asp   | Glu   | Phe   | Gly   | His                                                      | Ile   | Lys   | Leu    | Met   | Asn   | Pro   | Gln   | Arg   | Ser   | Thr   | Val   | Trp   | Tyr   |
| <i>Prochlorococcus marinus</i> | CCMP 1986 | All             | 1717                | 113.007                 | 0.345 | 8.998 | 4.97%  | 1.08% | 4.95% | 6.71% | 4.70% | 5.99% | 1.29%                                                    | 9.14% | 8.87% | 10.57% | 1.35% | 6.31% | 3.54% | 2.86% | 3.66% | 7.62% | 4.38% | 5.06% | 1.10% | 2.76% |
| <i>Prochlorococcus marinus</i> | CCMP 1986 | Overlapping     | 1286                | 112.681                 | 0.345 | 8.910 | 5.04%  | 1.08% | 5.02% | 6.72% | 4.51% | 6.16% | 1.34%                                                    | 9.11% | 8.74% | 10.53% | 1.34% | 6.31% | 3.61% | 2.94% | 3.75% | 7.61% | 4.43% | 5.17% | 1.09% | 2.62% |
| <i>Prochlorococcus marinus</i> | CCMP 1986 | Urea and Glut   | 18                  | 110.328                 | 0.313 | 8.888 | 5.96%  | 1.16% | 4.80% | 6.95% | 4.77% | 7.77% | 1.60%                                                    | 9.36% | 7.91% | 9.80%  | 1.76% | 5.74% | 3.40% | 2.76% | 3.50% | 6.94% | 4.56% | 5.38% | 0.76% | 2.50% |
| <i>Prochlorococcus marinus</i> | MIT 9313  | All             | 2269                | 109.954                 | 0.373 | 7.712 | 9.47%  | 1.24% | 4.93% | 5.70% | 3.10% | 7.61% | 2.07%                                                    | 4.71% | 3.27% | 12.27% | 1.70% | 3.03% | 5.02% | 4.75% | 6.41% | 6.69% | 4.67% | 6.70% | 1.49% | 1.75% |
| <i>Prochlorococcus marinus</i> | MIT 9313  | Overlapping     | 1286                | 109.582                 | 0.374 | 7.601 | 9.77%  | 1.23% | 5.00% | 5.97% | 2.89% | 7.89% | 2.15%                                                    | 4.58% | 2.97% | 12.39% | 1.72% | 2.86% | 5.16% | 4.73% | 6.62% | 6.36% | 4.66% | 7.05% | 1.40% | 1.69% |
| <i>Prochlorococcus marinus</i> | MIT 9313  | Urea and Glut   | 18                  | 108.962                 | 0.353 | 7.747 | 10.18% | 1.30% | 4.87% | 6.32% | 2.65% | 8.71% | 2.62%                                                    | 4.92% | 2.56% | 11.94% | 1.51% | 2.67% | 5.35% | 4.61% | 5.96% | 5.62% | 4.82% | 7.40% | 0.87% | 1.40% |
