# Supplementary material for: The significance of nitrogen cost minimization in proteomes of marine microorganisms
Source: PubMed Central journal article supplement — ISME J. 2011 Jun 23;6(1):71–80. doi: 10.1038/ismej.2011.72 (PMC3246230; doi:10.1038/ismej.2011.72), 2011-06-23
Supplement: ismej201172x5.pdf [file ismej201172x5.pdf]

**Table S5a: Marine microbe and PATRIC microbe nonhydrophobic statistical results.** Four groups, marine microbe proteins, PATRIC microbe proteins and transporters for each were analyzed for nitrogen content of nonhydrophobic residues. These data were tested using ANOVA and the multiple comparison test.

|                                  |                             | ANOVA results |           |                        |          |  |
|----------------------------------|-----------------------------|---------------|-----------|------------------------|----------|--|
| Source                           | SS                          | df            | MS        | F                      | Prob>F   |  |
| Groups                           |                             | 1360.7        | 3         | 453.558                | 16266.12 |  |
| Error                            |                             | 116064.6      | 4162468   | 0.028                  | 0        |  |
| Total                            |                             | 117425.2      | 4162471   |                        |          |  |
| Multiple comparison test results |                             |               |           |                        |          |  |
| Type 1                           | Type 2                      | Average 1     | Average 2 | Significant (p<0.0001) |          |  |
| Marine microbe genomes           | Marine microbe transporters |               | 0.64      | 0.58                   | Yes      |  |
| Marine microbe genomes           | PATRIC genomes              |               | 0.64      | 0.67                   | Yes      |  |
| Marine microbe genomes           | PATRIC genome transporters  |               | 0.64      | 0.60                   | Yes      |  |
| Marine microbe transporters      | PATRIC genomes              |               | 0.58      | 0.67                   | Yes      |  |
| Marine microbe transporters      | PATRIC genome transporters  |               | 0.58      | 0.60                   | Yes      |  |
| PATRIC genomes                   | PATRIC genome transporters  |               | 0.67      | 0.60                   | Yes      |  |

**Table S5b: Marine microbe and PATRIC microbe statistical results.** Four groups, marine microbe proteins, PATRIC microbe proteins and transporters for each were analyzed for nitrogen content of residues. These data were tested using ANOVA and the multiple comparison test.

|                                  |                             | ANOVA results |           |                        |          |  |
|----------------------------------|-----------------------------|---------------|-----------|------------------------|----------|--|
| Source                           | SS                          | df            | MS        | F                      | Prob>F   |  |
| Groups                           |                             | 1074.5        | 3         | 358.183                | 37852.82 |  |
| Error                            |                             | 39387.5       | 4162469   | 0.009                  | 0        |  |
| Total                            |                             | 40462         | 4162472   |                        |          |  |
| Multiple comparison test results |                             |               |           |                        |          |  |
| Type 1                           | Type 2                      | Average 1     | Average 2 | Significant (p<0.0001) |          |  |
| Marine microbe genomes           | Marine microbe transporters |               | 0.35      | 0.29                   | Yes      |  |
| Marine microbe genomes           | PATRIC genomes              |               | 0.35      | 0.36                   | Yes      |  |
| Marine microbe genomes           | PATRIC genome transporters  |               | 0.35      | 0.30                   | Yes      |  |
| Marine microbe transporters      | PATRIC genomes              |               | 0.29      | 0.36                   | Yes      |  |
| Marine microbe transporters      | PATRIC genome transporters  |               | 0.29      | 0.30                   | Yes      |  |
| PATRIC genomes                   | PATRIC genome transporters  |               | 0.36      | 0.30                   | Yes      |  |

**Table S5c: Genome comparisons for Prochlorococcus marinus CCMP1986 and MIT9313.** Whole proteomes and core proteomes were tested using ANOVA and the multiple comparison test.

|                                                 |                                                | ANOVA results |           |                      |          |  |
|-------------------------------------------------|------------------------------------------------|---------------|-----------|----------------------|----------|--|
| Source                                          | SS                                             | df            | MS        | F                    | Prob>F   |  |
| Groups                                          |                                                | 1.5179        | 5         | 0.30258              | 39.92    |  |
| Error                                           |                                                | 50.0961       | 6588      | 0.0076               | 1.45E-40 |  |
| Total                                           |                                                | 51.614        | 6593      |                      |          |  |
| Multiple comparison test results                |                                                |               |           |                      |          |  |
| Type 1                                          | Type 2                                         | Average 1     | Average 2 | Significant (p<0.01) |          |  |
| Prochlorococcus marinus CCMP 1986 - All         | Prochlorococcus marinus MIT 9313 - All         |               | 0.35      | 0.38                 | yes      |  |
| Prochlorococcus marinus CCMP 1986 - All         | Prochlorococcus marinus MIT 9313 - Overlapping |               | 0.35      | 0.38                 | yes      |  |
| Prochlorococcus marinus CCMP 1986 - Overlapping | Prochlorococcus marinus MIT 9313 - All         |               | 0.35      | 0.38                 | yes      |  |
| Prochlorococcus marinus CCMP 1986 - Overlapping | Prochlorococcus marinus MIT 9313 - Overlapping |               | 0.35      | 0.38                 | yes      |  |
